# Supplementary material for: Associations of Atrioventricular Blocks and Other Arrhythmias in Patients with Lyme Carditis: A Systematic Review and Meta-Analysis
Source: MDPI journal article supplement (doi:10.3390/jcdd11050131), 2024-04-23
Supplement: s1 [file s1]

**Table S1.** Demographic and clinical characteristics.

| Authors                     | # of patients | Age      | Gender             | Comorbidities                                                                                                                                             | Symptoms                                                     | Time to presentation    | Total time to resolution of symptoms |
|-----------------------------|---------------|----------|--------------------|-----------------------------------------------------------------------------------------------------------------------------------------------------------|--------------------------------------------------------------|-------------------------|--------------------------------------|
| Wan et al. [17]             | 5             | 35       | 5 males            | NA                                                                                                                                                        | 1-erythema migrans, 1- left facial nerve palsy, all symptoms | Acute                   | 10 days                              |
| Zainal et al. [18]          | 1             | 46       | Male               | NA                                                                                                                                                        | Chest pain and dyspnea                                       | 3 week                  | 2 weeks                              |
| Gazendam et al. [19]        | 1             | 22       | Male               | Asthma, drug abuse                                                                                                                                        | Syncope                                                      | 22 days                 | 3 weeks                              |
| Esfandiari et al. [20]      | 1             | 26       | Male               | NA                                                                                                                                                        | Rash                                                         | 1 week                  | 3 weeks                              |
| Franco-Avecilla et al. [21] | 1             | 56       | Female             | NA                                                                                                                                                        | Myalgia and syncope                                          | 15 days                 | 2 weeks                              |
| Bamgboje et al. [22]        | 1             | 36       | Male               | NA                                                                                                                                                        | Fatigue, malaise, and myalgia                                | 3 weeks                 | 2 weeks                              |
| Zaid et al. [23]            | 1             | 19       | Female             | Chronic headaches, phthisis bulbi with secondary right eye blindness, pseudotumor cerebri, and severe obesity status post-laparoscopic sleeve gastrectomy | Headache and dyspnea                                         | 2 weeks                 | 2 weeks                              |
| Arroja et al. [24]          | 1             | 42       | Male               | NA                                                                                                                                                        | Palpitations                                                 | 2 days                  | 2 weeks                              |
| Kannangara et al. [25]      | 1             | 37       | Male               | NA                                                                                                                                                        | Syncope                                                      | 1 day                   | 5 days                               |
| Rojas-Marte et al. [26]     | 1             | 19       | Male               | NA                                                                                                                                                        | Syncope                                                      | 2 days                  | 1 week                               |
| Khetpal et al. [27]         | 1             | 34       | Female             | NA                                                                                                                                                        | Syncope and shortness of breath                              | 2 weeks                 | 11 days                              |
| Wang et al. [28]            | 1             | 28       | Male               | NA                                                                                                                                                        | Syncope                                                      | 4 days                  | 2 days                               |
| Yoon et al. [29]            | 1             | 17       | Male               | NA                                                                                                                                                        | Viral syndrome                                               | 14 days                 | 1 day                                |
| Dobbs et [30]               | 1             | 37       | Female             | NA                                                                                                                                                        | Numbness and tingling                                        | 5 days                  | 14 days                              |
| Beach et al. [31]           | 1             | 17       | Male               | NA                                                                                                                                                        | Syncope                                                      | 14 days                 | 10 days                              |
| Shabbir et al. [32]         | 1             | 23       | Male               | NA                                                                                                                                                        | Palpitations                                                 | 3 days                  | 14 days                              |
| Kennel et al. [33]          | 1             | 20       | Male               | Cardiac rhabdomyosarcoma                                                                                                                                  | Palpitations                                                 | 2 days                  | 1 day                                |
| Brunner et al. [34]         | 1             | 42       | Male               | NA                                                                                                                                                        | Palpitations                                                 | 1 day                   | 24 days                              |
| Greenberg et al. [35]       | 1             | 42       | Male               | NA                                                                                                                                                        | Fatigue and loose stool                                      | 2 days                  | 14 days                              |
| Siebenlist et al. [36]      | 1             | 28       | Male               | NA                                                                                                                                                        | Syncope                                                      | 3 weeks                 | 10 days                              |
| Rostoff et al. [37]         | 1             | 49       | Male               | NA                                                                                                                                                        | Shortness of breath                                          | 5 days                  | 15 days                              |
| Aringer et al. [38]         | 1             | 23       | Male               | NA                                                                                                                                                        | Oligoarthritis                                               | 1 day                   | 14 days                              |
| Aringer et al. [38]         | 1             | 49       | Male               | NA                                                                                                                                                        | Oligoarthritis                                               | 7 weeks                 | 4 weeks                              |
| Vasiljević et al. [39]      | 3             | 38,36,33 | Female, Male, Male | NA                                                                                                                                                        | Syncope                                                      | 3 weeks, 2 days, 7 days | 2 weeks, 2 days, 1 month             |
| Panic et al. [40]           | 1             | 36       | Female             | NA                                                                                                                                                        | Fatigue                                                      | 10 days                 | 12 days                              |
| Dam et al. [41]             | 1             | 44       | Male               | NA                                                                                                                                                        | Fatigue                                                      | 5 days                  | 15 days                              |

|                                 |    |      |                      |                                                    |                                   |                    |         |
|---------------------------------|----|------|----------------------|----------------------------------------------------|-----------------------------------|--------------------|---------|
| Manek et al. [42]               | 1  | 20   | Male                 | NA                                                 | Syncopal                          | 14 days            | 1 day   |
| Nutt et al. [43]                | 1  | 20   | Male                 | NA                                                 | Syncopal                          | 10 days            | 10 days |
| Khalil et al. [44]              | 1  | 24   | Male                 | NA                                                 | Rash                              | 3 weeks            | 2 days  |
| Mayer et al. [45]               | 1  | 36   | Female               | NA                                                 | Rash                              | 2 weeks            | 4 days  |
| Jensen et al. [46]              | 1  | 45   | Female               | NA                                                 | Syncopal                          | 2 days             | 1 day   |
| Jiménez-Castillo RA et al. [47] | 1  | 23   | Female               | NA                                                 | Syncopal                          | 4 days             | 1 day   |
| Lórin                           | 1  | 44   | Female               | NA                                                 | Rash                              | 2 weeks            | 3 weeks |
| Vlay et al. [49]                | 1  | 67   | Male                 | Smoking and hypertension                           | Rash                              | 2 weeks            | 2 weeks |
| Munk et al. [50]                | 1  | 34   | Male                 | NA                                                 | Syncopal                          | 11 days            | 14 days |
| Dernedde et al. [51]            | 1  | 47   | Male                 | NA                                                 | Rash                              | 11 days            | 5 days  |
| Isath et al. [52]               | 1  | 22   | Male                 | NA                                                 | Fever and rash                    | 14 days            | 3 days  |
| Timmer et al. [53]              | 1  | 45   | Male                 | Smoking and alcohol use                            | Near syncopal                     | 4 days             | 3 days  |
| Clinckaert et al. [54]          | 1  | 49   | Male                 | Renal tumor s/p nephrectomy                        | Abdominal pain                    | A few weeks before | 21 days |
| Zande et al. [55]               | 1  | 58   | Male                 | NA                                                 | Rash                              | 2 weeks            | 14 days |
| Matthiae et al. [56]            | 1  | 39   | Male                 | NA                                                 | Palpitations                      | Several days       | 5 days  |
| Xanthos et al. [57]             | 1  | 44   | Male                 | Hyperlipidemia and smoking                         | Dizziness                         | 21 days            | 3 days  |
| Rosenfeld et al. [58]           | 1  | 31   | Male                 | NA                                                 | Syncopal, seizures and fever      | 2 days             | 7 days  |
| Wenger et al. [59]              | 1  | 51   | Male                 | NA                                                 | Chest pain and dyspnea            | 3 days             | 60 days |
| Bhattacharya et al. [60]        | 1  | 54   | Female               | NA                                                 | Syncopal                          | 3 weeks            | 2 days  |
| Lo et al. [61]                  | 1  | 63   | Female               | Hypertension                                       | Dyspnea                           | 7 days             | 21 days |
| Semmler et al. [62]             | 1  | 37   | Male                 | NA                                                 | Dizziness                         | 1 day              | 10 days |
| Chauhan et al. [63]             | 1  | 47   | Male                 | NA                                                 | Syncopal                          | 3 days             | 21 days |
| Franck et al. [64]              | 1  | 66   | Male                 | NA                                                 | Syncopal                          | Unknown            | 19 days |
| Brownstein et al. [65]          | 1  | 31   | Male                 | NA                                                 | Syncopal                          | 1 day              | 7 days  |
| Prochnau et al. [66]            | 1  | 34   | Male                 | NA                                                 | Syncopal                          | 14 days            | 5 days  |
| Semproni et al. [67]            | 1  | 37   | Male                 | NA                                                 | Fever and rash                    | 3 days             | 3 days  |
| Konopka et al. [68]             | 1  | 41   | Female               | NA                                                 | Dyspnea                           | 1 day              | 21 days |
| Marx et al. [69]                | 1  | 57   | Male                 | NA                                                 | Fever and rash                    | 7 days             | None    |
| Marx et al. [69]                | 1  | 49   | Female               | NA                                                 | Syncopal and urinary incontinence | 1 day              | None    |
| Kaczmarek et al. [70]           | 16 | 61.9 | 11 male and 5 female | HTN 12/16, T2DM 4/16, IHD 4/16, Afib 3/16, HF 2/16 | Syncopal                          | NA                 | None    |
| Patel et al. [71]               | 1  | 59   | Male                 | NA                                                 | Syncopal                          | 6 weeks            | None    |
| Reznick et al. [72]             | 1  | 39   | Male                 | NA                                                 | Rash                              | 2 weeks            | None    |
| Cary et al. [73]                | 1  | 31   | Male                 | HTN, nephrolithiasis, appendectomy                 | Rash                              | 3 months           | None    |
| Steere et al. [74]              | 19 | 30   | Male                 | NA                                                 | Shortness of breath               | NA                 | None    |

|                       |   |    |        |                     |                     |             |      |
|-----------------------|---|----|--------|---------------------|---------------------|-------------|------|
|                       |   | 36 | Male   | NA                  | Syncope             | NA          | None |
|                       |   | 26 | Male   | NA                  | Palpitations        | NA          | None |
|                       |   | 20 | Female | NA                  | Syncope             | NA          | None |
|                       |   | 19 | Male   | NA                  | Syncope, chest pain | NA          | None |
|                       |   | 22 | Male   | NA                  | Syncope             | NA          | None |
|                       |   | 39 | Male   | NA                  | Palpitations        | NA          | None |
|                       |   | 40 | Male   | NA                  | Chest pain          | NA          | None |
|                       |   | 30 | Male   | NA                  | Dizziness           | NA          | None |
|                       |   | 31 | Female | NA                  | Palpitations        | NA          | None |
|                       |   | 58 | Male   | NA                  | Palpitations        | NA          | None |
|                       |   | 30 | Male   | NA                  | Palpitations        | NA          | None |
|                       |   | 20 | Female | NA                  | Palpitations        | NA          | None |
|                       |   | 32 | Male   | NA                  | Palpitations        | NA          | None |
|                       |   | 32 | Female | NA                  | Palpitations        | NA          | None |
|                       |   | 35 | Male   | NA                  | Palpitations        | NA          | None |
|                       |   | 23 | Male   | NA                  | Palpitations        | NA          | None |
|                       |   | 23 | Male   | NA                  | Palpitations        | NA          | None |
|                       |   | 19 | Male   | NA                  | Palpitations        | NA          | None |
| Muhammad et al. [75]  | 1 | 55 | Male   | NA                  | Malaise             | NA          | None |
| Baron et al. [76]     | 1 | 30 | Male   | NA                  | Rash and dizziness  | NA          | None |
| Büscher et al. [77]   | 1 | 31 | Female | NA                  | Syncope             | NA          | None |
| Rubin et al. [78]     | 1 | 52 | Male   | NA                  | Syncope             | 21 days     | None |
| Wagner et al. [79]    | 1 | 30 | Male   | NA                  | Dizziness           | 5 weeks ago | None |
| Kaczmarek et al. [80] | 1 | 48 | Male   | Dyslipidemia        | Dizziness           | Years ago   | None |
| Celorio et al. [81]   | 1 | 36 | Male   | NA                  | Syncope             | 1 month     | None |
| Kashou et al. [82]    | 1 | 26 | Male   | NA                  | Dizziness           | 1 month     | None |
| Kashou et al. [82]    | 1 | 18 | Male   | NA                  | Dizziness           | 1 month     | None |
| Riaz et al. [83]      | 1 | 27 | Male   | NA                  | Fever and rash      | 1 month     | None |
| Legatowicz-           | 1 | 60 | Male   | Atrial fibrillation | Dyspnea             | 1 week      | None |
| Koprowska et al. [84] |   |    |        |                     |                     |             |      |

---

HTN—hypertension, T2DM—Type 2 Diabetes Mellitus, IHD—Ischemic Heart Disease, Afib—Atrial Fibrillation, HF—heart failure, NA—not available

**Table S2.** Management and outcomes.

| Authors                         | Treatment                                        | Reversibility | Outcome   |
|---------------------------------|--------------------------------------------------|---------------|-----------|
| Wan et al. [17]                 | IV Ceftriaxone and oral doxycycline              | Yes           | All alive |
| Zainal et al. [18]              | IV Ceftriaxone                                   | Yes           | Alive     |
| Gazendam et al. [19]            | IV Ceftriaxone                                   | Yes           | Alive     |
| Esfandiari et al. [20]          | IV Ceftriaxone, doxycycline and magnesium        | No            | Alive     |
| Franco-Avecilla et al. [21]     | IV Ceftriaxone                                   | Yes           | Alive     |
| Bamgboje et al. [22]            | IV Ceftriaxone and pacemaker                     | No            | Alive     |
| Zaid et al. [23]                | IV Ceftriaxone                                   | Yes           | Alive     |
| Arroja et al. [24]              | IV Amoxicillin                                   | Yes           | Alive     |
| Kannangara et al. [25]          | IV Ceftriaxone and oral doxycycline              | Yes           | Alive     |
| Rojas-Marte et al. [26]         | IV Ceftriaxone                                   | Yes           | Alive     |
| Khetpal et al. [27]             | IV Ceftriaxone                                   | Yes           | Alive     |
| Wang et al. [28]                | Pacemaker                                        | No            | Alive     |
| Yoon et al. [29]                | Pericardiocentesis, CPR                          | No            | Dead      |
| Dobbs et al. [30]               | IV Ceftriaxone                                   | Yes           | Alive     |
| Beach et al. [31]               | IV Ceftriaxone                                   | Yes           | Alive     |
| Shabbir et al. [32]             | IV Ceftriaxone                                   | Yes           | Alive     |
| Kennel et al. [33]              | None                                             | Yes           | Alive     |
| Brunner et al. [34]             | IV Ceftriaxone                                   | Yes           | Alive     |
| Greenberg et al. [35]           | IV Ceftriaxone                                   | Yes           | Alive     |
| Siebenlist et al. [36]          | IV Ceftriaxone                                   | Yes           | Alive     |
| Rostoff et al. [37]             | Pacemaker placement                              | Yes           | Alive     |
| Aringer et al. [38]             | IV Ceftriaxone                                   | Yes           | Alive     |
| Aringer et al. [38]             | IV Ceftriaxone                                   | Yes           | Alive     |
| Vasiljević et al. [39]          | IV penicillin G                                  | Yes           | Alive     |
| Panic et al. [40]               | IV ceftriaxone and metronidazole                 | Yes           | Alive     |
| Dam et al. [41]                 | IV Ceftriaxone                                   | Yes           | Alive     |
| Manek et al. [42]               | IV Ceftriaxone and pacing                        | Yes           | Alive     |
| Nutt et al. [43]                | IV Ceftriaxone and temporary pacemaker placement | Yes           | Alive     |
| Khalil et al. [44]              | Pacemaker                                        | Yes           | Alive     |
| Mayer et al. [45]               | IV Ceftriaxone                                   | Yes           | Alive     |
| Jensen et al. [46]              | IV Ceftriaxone and pacemaker                     | No            | Dead      |
| Jiménez-Castillo RA et al. [47] | IV Ceftriaxone and pacing                        | No            | Alive     |
| Lórinicz et al. [48]            | Prednisone and atropine                          | No            | Alive     |

[illegible]

|                                  |                                                      |     |       |
|----------------------------------|------------------------------------------------------|-----|-------|
|                                  |                                                      | Yes | Alive |
| Muhammad et al. [75]             | Ceftriaxone                                          | Yes | Alive |
| Baron et al. [76]                | Ceftriaxone and temporary pacing>permanent pacemaker | No  | Alive |
| Büscher et al. [77]              | Doxycycline and ILR                                  | Yes | Alive |
| Rubin et al. [78]                | Cefuroxime and doxycycline                           | Yes | Alive |
| Wagner et al. [79]               | Doxycycline                                          | Yes | Alive |
| Kaczmarek et al. [80]            | Ceftriaxone                                          | No  | Alive |
| Celorio et al. [81]              | Ceftriaxone                                          | No  | Alive |
| Kashou et al. [82]               | Ceftriaxone                                          | Yes | Alive |
| Kashou et al. [82]               | Doxycycline                                          | Yes | Alive |
| Riaz et al. [83]                 | Ceftriaxone                                          | Yes | Alive |
| Legatowicz-Koprowska et al. [84] | Ceftriaxone and doxycycline                          | Yes | Alive |

---

IV—intravenous, ILR—implantable loop recorder
